# Supplementary material
Source: PubMed Central journal article supplement (PMC3395721)

depicting the multiple functions of IPMK as a soluble InsPs kinase, and as a PI3-kinase acting on both membrane bound PIP<sub>2</sub> and SF-1/PIP<sub>2</sub>. SF-1 transcriptional output is affected after IPMK and PTEN modify the solvent-exposed phospholipid head group present in the bound PIP<sub>2</sub> or PIP<sub>3</sub> ligands.

**Fig. S1. p110 $\gamma$ , the kinase dead rIPMK mutant (D127A), and IP<sub>3</sub> kinase fail to generate PIP<sub>3</sub> from SF-1/PIP<sub>2</sub>.** HPLC chromatographs of glyceroinositol head groups after <sup>32</sup>P- $\gamma$ ATP IVK reactions using 100nM (A) WT rIPMK, (B) KD rIPMK, (C) human p110 $\alpha$ /p85 $\alpha$  or (D) p110 $\gamma$ , incubated with either PIP<sub>2</sub>/PS micelles (left panels) or 1  $\mu$ M SF-1/PIP<sub>2</sub> substrate (right panels), as indicated, for 30 min at 37C. Migration of glyceroinositol (1,3,4,5)P following deacylation of PIP<sub>3</sub> is indicated with red arrowheads. E) Autoradiography of 10 minute IVK reactions on 10  $\mu$ M SF-1/PIP<sub>2</sub> analyzed by nitrocellulose capture, using indicated concentrations of indicated enzymes.

**Fig. S2. Enzyme/Substrate Kinetic Parameters, and Ins(1,4,5)P competitive inhibition of IPMK activity on SF-1/PIP<sub>2</sub>.** Human IPMK velocities plotted against increasing substrate concentrations as measured by nitrocellulose capture assays of IVK reactions. Data were fit to (A) linear double-reciprocal (Lineweaver-Burke) and non-linear (Michaelis-Menton, Refer to Fig. 2) curves by GraphPad Prism software. (B) Non-linear and linear curve fits of IPMK reaction velocities on SF-1/PIP<sub>2</sub> as determined above, except in the presence of indicated [Ins(1,4,5)P]. Data are presented fitted to non-linear and linear plots, fitted as in (A). (C) Table of kinetic parameters at each Ins(1,4,5)P

concentration shows a constant  $V_{MAX}$ , with a changing  $K_M$ ; values are expressed in the bar graph (right). **(D)** PTEN activity on SF-1/PIP<sub>2</sub> was measured by extracting the PTEN reaction product (SF-1/PIP<sub>2</sub>) into 1:1 MeOH:CHCl<sub>3</sub> and coupling to a p110 $\alpha$ /p85 $\alpha$  <sup>32</sup>P- $\gamma$ ATP IVK reaction, as described in materials and methods. Data were fit to non-linear Michaelis-Menton and linear double-reciprocal Lineweaver-Burke curves by GraphPad Prism software.

**Fig. S3 Overexpression of different IPMKs has no effect on SF-1 transcripts.** **(A)** *SF-1* transcripts after siIPMK or siCON followed by transient transfection of indicated IPMK expression constructs, as described in Methods. **(B)** Expression of myc-tagged IPMK proteins in HEK 293 SF-1 cells treated identically as in (A).

**Fig. S4. SF-1 transcripts and nuclear localization are unaffected by ATA.**

**Wortmannin does not recapitulate ATA effects on SF-1 target genes** **(A)** SF-1 transcript levels are shown in WT and Pocket Mutant (A270W, L345F) HEK 293 SF-1 cells following ATA or EGCG treatment. **(B)** Immunocytochemistry of 3X-FLAG tagged SF-1 in HEK 293 SF-1 cells treated with vehicle or ATA, as described in Materials and Methods. **(C)** IPMK activity on SF-1/PIP<sub>2</sub> in the presence of indicated compounds at indicated concentrations. **(D)** qPCR measuring transcript levels of indicated genes in HEK 293 SF-1 cells after 14 hrs treatment with wortmannin (WORT, 10  $\mu$ M) or DMSO vehicle control.

**Fig S5. The SF-1 protein component purified from HEK 293 cells is not phosphorylated by recombinant IPMK.** (A) Silver stained SDS-PAGE of FLAG-peptide eluates from TET-induced HEK 293 SF-1 cells demonstrating purity of SF-1 protein. Molecular weight standards are indicated to the left. Western blot of FLAG peptide eluates from EtOH and TET-induced HEK 293 SF-1 cells probed with anti-FLAG antibodies. (B) Autoradiography of IVK reactions (shown in Figure 6A) separated by SDS-PAGE (upper panel). Following exposure for 18 hrs, gels were silver stained to confirm equal loading of lanes and the presence of all SF-1 and IPMK proteins; experimental conditions in each reaction are indicated.

**Table S1 RT-qPCR Primers**

| Gene          | Accession | Forward Primer Sequence  | Reverse Primer Sequence |
|---------------|-----------|--------------------------|-------------------------|
| mSF-1 (NR5A1) | NM_139051 | CGTCTGTCTCAAGTTCCTCATCCT | TCCTTTACGAGGCTGTGGTTGT  |
| hSHP (NR0B2)  | NM_021969 | GCTTAGCCCCAAGGAATATGC    | TTGGAGGCCTGGCACATC      |
| hStAR         | NM_000349 | CCCATGGAGAGGCTCTATGAA    | GTTCCACTCCCCATTGCT      |
| hCYP17A1      | NM_000102 | AGGACTTCTCTGGGCGGCCT     | GTGTGCGCCAGAGTCAGCGA    |
| hCYP11A1      | NM_000781 | GGGTCGCCTATCACCAGTATT    | GCTGCCGACTTCTTCAACAG    |
| hGAPDH        | NM_002046 | CAAGGTCATCCATGACAACCTTG  | GGCCATCCACAGTCTTCTGG    |
| hTBP          | NM_003194 | CCTAAAGACCATTGCACTTCGT   | AGCAAACCGCTTGGGATTA     |

**Table S2 ChIP-qPCR Primers**

| Gene   | Accession | Forward primer sequence | Reverse primer sequence |
|--------|-----------|-------------------------|-------------------------|
| hHSP70 | NM_198431 | TCTGGAGAGTTCTGAGCAGG    | CCCTTCTGAGCCAATCACCG    |
| hStAR  | NM_000349 | CCACAAACGGCCAAGCA       | CGCCATCACTCACTGTGCAA    |

**Fig. S1, Blind, et al.**

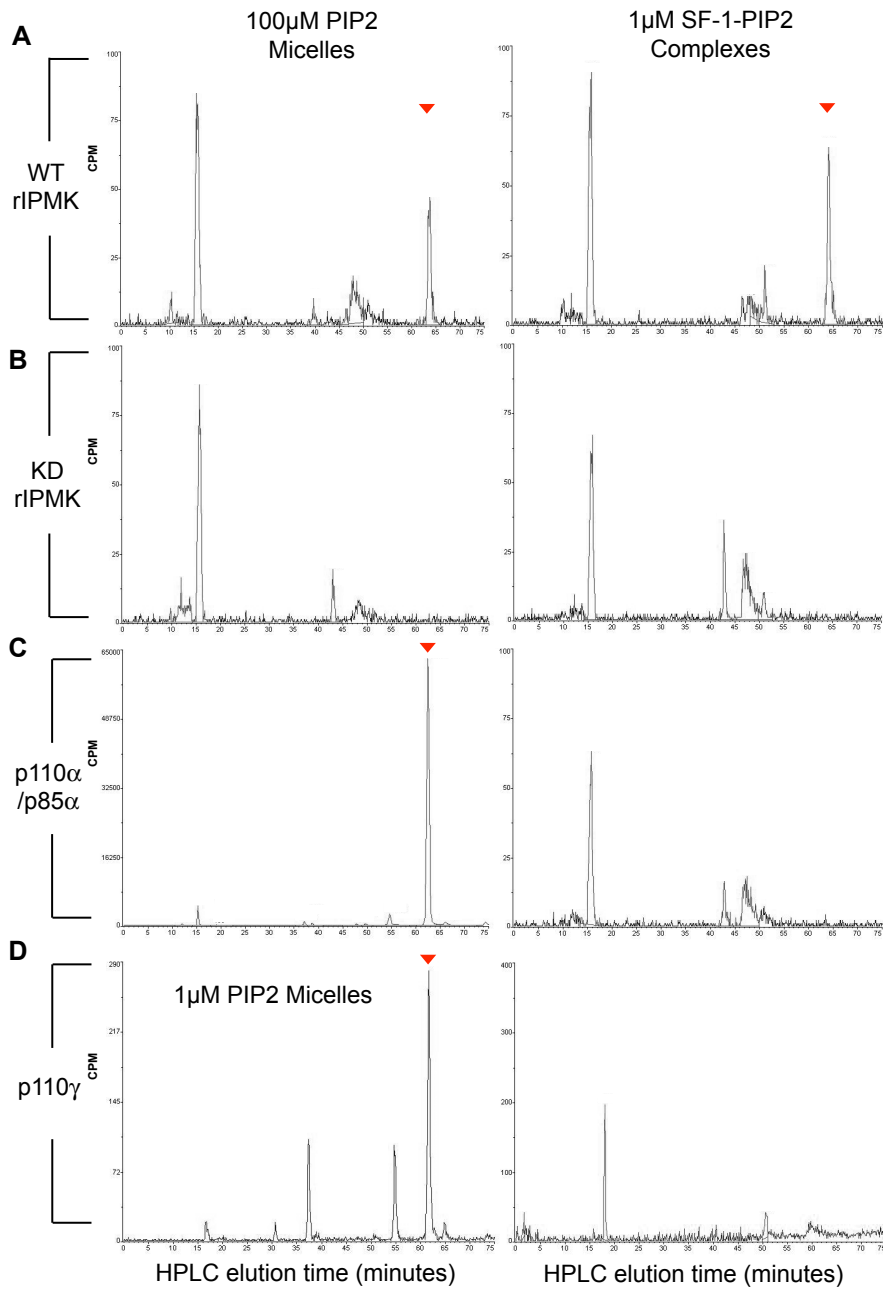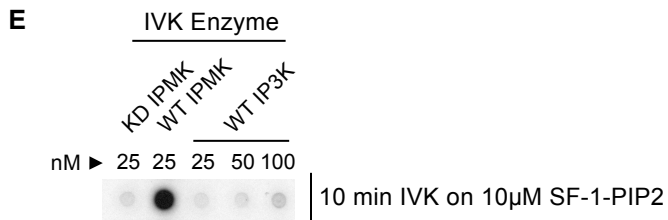

**Fig. S2, Blind., et al.**

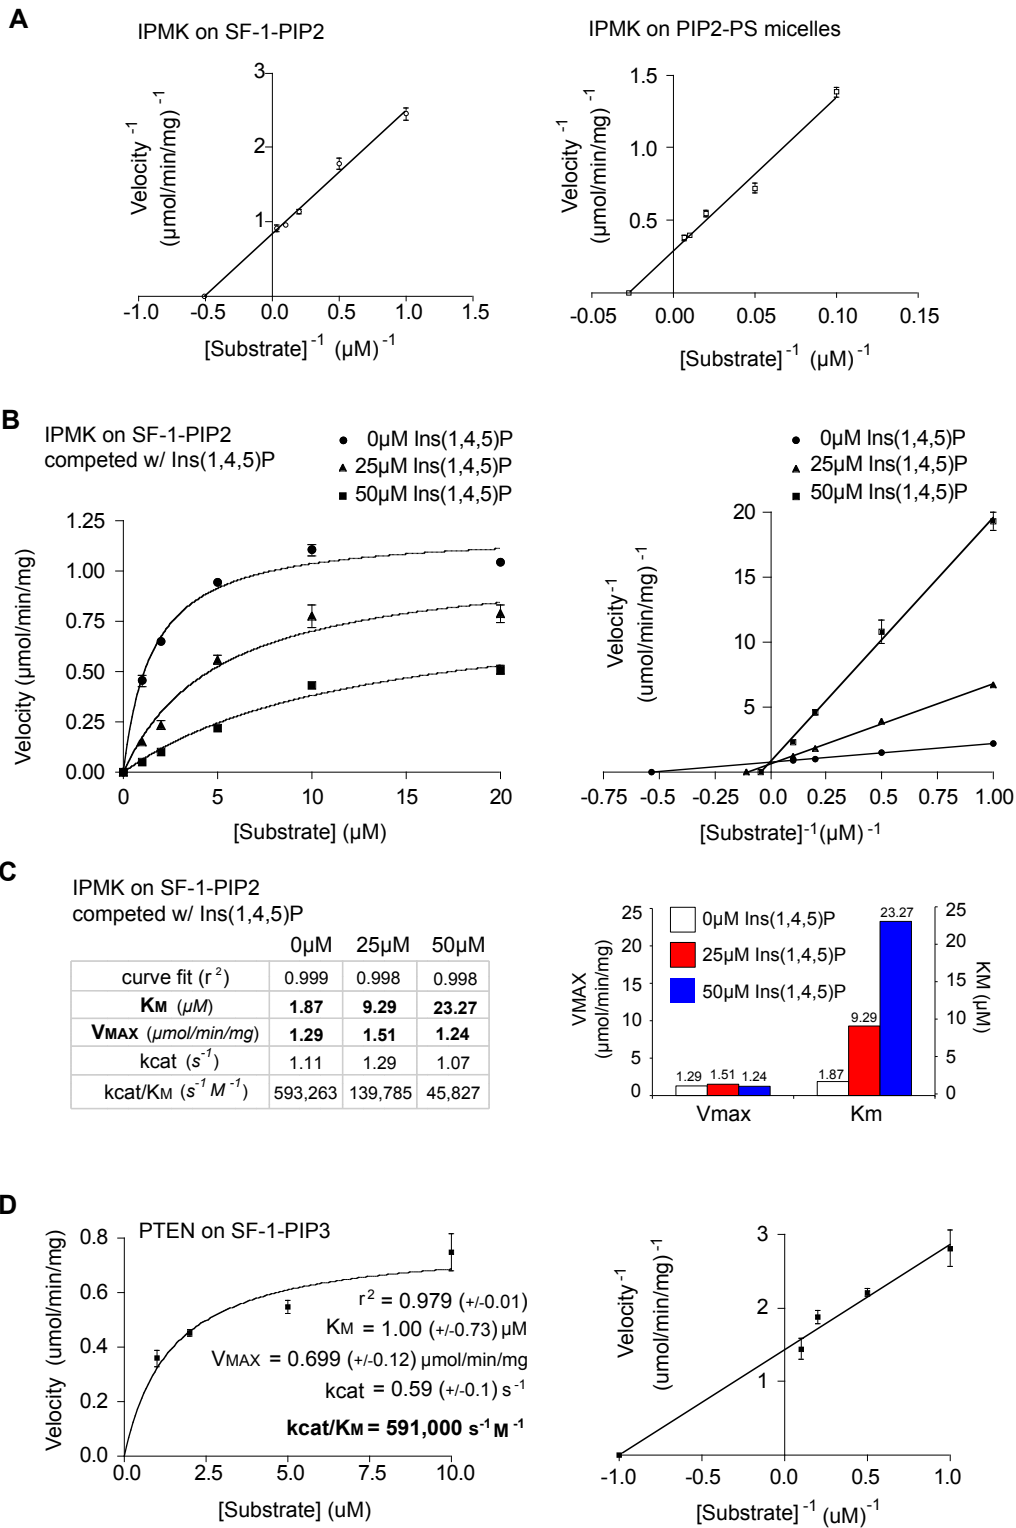

**Fig. S3. Blind, et al.**

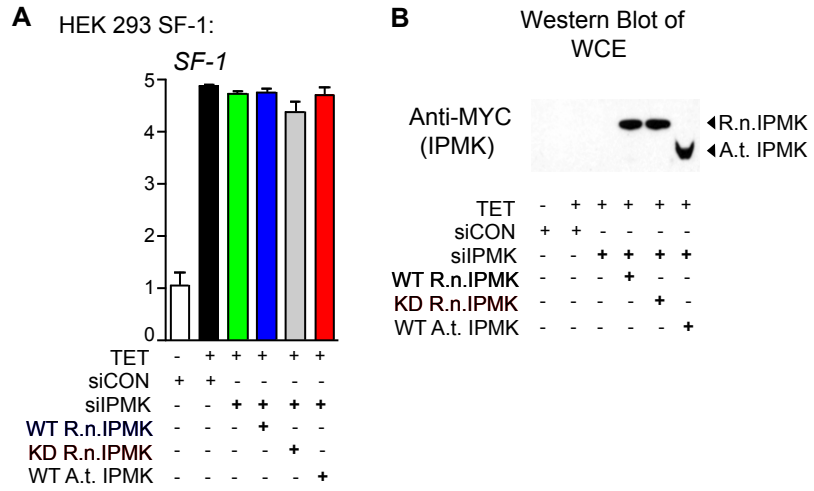

**Fig. S4. Blind, et al.**

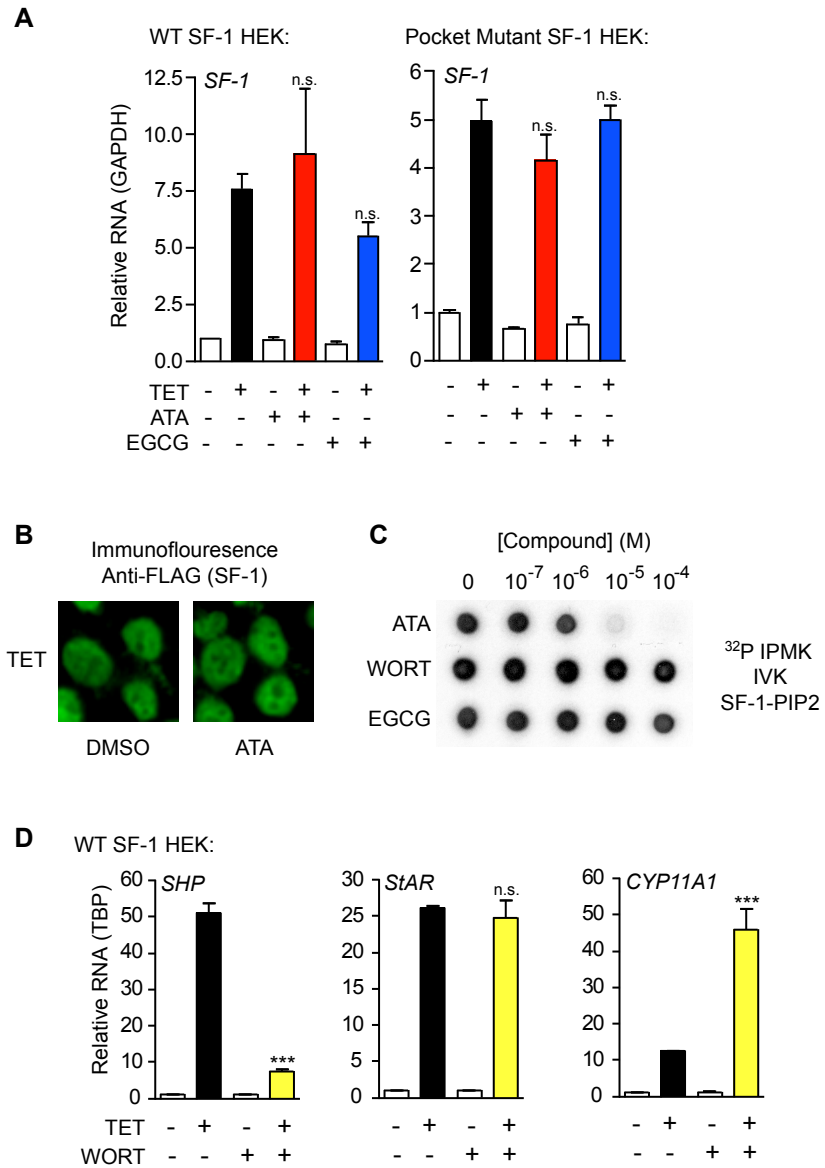

**Fig. S5, Blind., et al.**

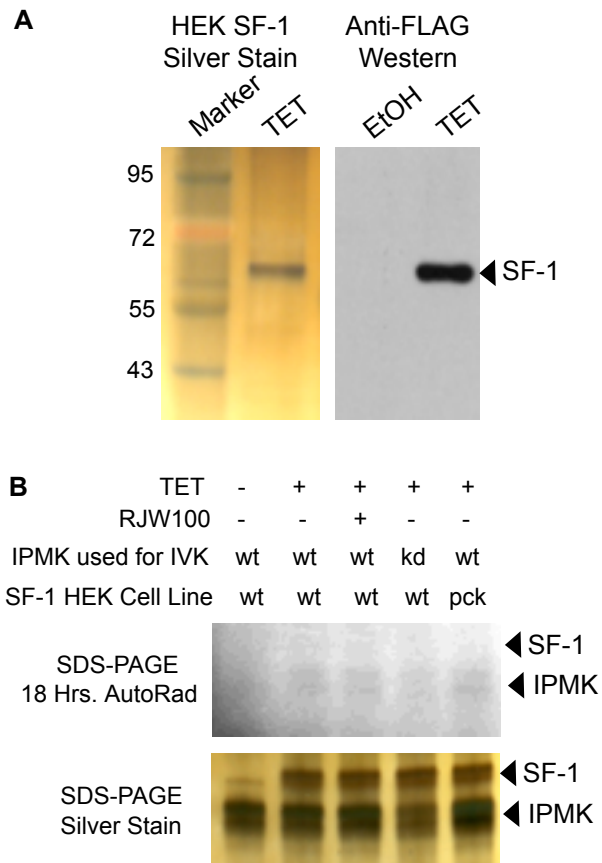

Supplement: NIHMS387105-supplement-supplement_1.pdf [file NIHMS387105-supplement-supplement_1.pdf]
